# Supplementary material for: MGDrivE 3: A decoupled vector-human framework for epidemiological simulation of mosquito genetic control tools and their surveillance
Source: PubMed Central journal article supplement — bioRxiv. 2023 Sep 12:2023.09.09.556958. Preprint. [Version 1] doi: 10.1101/2023.09.09.556958 (PMC10515759; doi:10.1101/2023.09.09.556958), 2023-09-12
Supplement: media-2.pdf [file media-2.pdf]

**Table S1.** Model parameters describing the gene drive construct, mosquito bionomics and malaria epidemiology for simulations resembling releases on São Tomé, São Tomé and Príncipe.

| Symbol:                      | Parameter:                                                                                                          | Value: | Reference: |
|------------------------------|---------------------------------------------------------------------------------------------------------------------|--------|------------|
| <b>Gene drive construct:</b> |                                                                                                                     |        |            |
| $f_{HH}$                     | Homozygous fitness (relative to wildtype) on female mosquitoes                                                      | 0.9    | [1]        |
| $f_H$                        | Hemizygous fitness (relative to wildtype) on female mosquitoes                                                      | 0.9    | [1]        |
| $m_{HH}$                     | Homozygous male mating competitiveness                                                                              | 1.05   | [1]        |
| $m_H$                        | Hemizygous male mating competitiveness                                                                              | 1.78   | [1]        |
| $p^M_W$                      | Probability of wildtype allele staying intact across one generation in male mosquitoes                              | 0.0212 | [1]        |
| $p^M_H$                      | Probability of wildtype allele converting to H allele across one generation in male mosquitoes                      | 0.979  | [1]        |
| $p^F_W$                      | Probability of wildtype allele staying intact across one generation in female mosquitoes                            | 0.0015 | [1]        |
| $p^F_H$                      | Probability of wildtype allele converting to H allele across one generation in female mosquitoes                    | 0.985  | [1]        |
| $p^{HH}_W$                   | Probability of wildtype allele staying intact across one generation in gravid, homozygous female mosquitoes         | 0.938  | [1]        |
| $p^{HH}_R$                   | Probability of wildtype allele converting to R allele across one generation in gravid, homozygous female mosquitoes | 0.0122 | [1]        |
| $p^{HH}_B$                   | Probability of wildtype allele converting to B allele across one generation in gravid, homozygous female mosquitoes | 0.0437 | [1]        |
| $p^H_W$                      | Probability of wildtype allele staying intact across one generation in gravid, hemizygous female mosquitoes         | 0.997  | [1]        |
| $p^H_R$                      | Probability of wildtype allele converting to R allele across one generation in gravid, hemizygous female mosquitoes | 0.0007 | [1]        |
| $p^H_B$                      | Probability of wildtype allele converting to B allele across one generation in gravid, hemizygous female mosquitoes | 0.0017 | [1]        |
| $b_{WW}$                     | Wildtype mosquito-to-human transmission probability                                                                 | 0.55   | [1]        |
| $b_H$                        | TP13 drive mosquito-to-human transmission probability                                                               | 0      | [1]        |
| $c$                          | Human-to-mosquito transmission probability                                                                          | 0.15   | [1]        |
| <b>Vector biology:</b>       |                                                                                                                     |        |            |
| $\beta$                      | Egg production per adult female (per day)                                                                           | 21     | [2]        |
| $T_E$                        | Mean duration of egg stage (days)                                                                                   | 3      | [2]        |
| $T_L$                        | Mean duration of larval stage (days)                                                                                | 7      | [2]        |
| $T_P$                        | Mean duration of pupal stage (days)                                                                                 | 1      | [2]        |

|                                             |                                                                                                     |              |     |
|---------------------------------------------|-----------------------------------------------------------------------------------------------------|--------------|-----|
| $CV(T_E)$                                   | Coefficient of variation, egg stage                                                                 | 0.2          | [3] |
| $CV(T_L)$                                   | Coefficient of variation, larval stage                                                              | 0.3          | [3] |
| $CV(T_P)$                                   | Coefficient of variation, pupal stage                                                               | 0.2          | [3] |
| $K$                                         | Larval carrying capacity                                                                            | Time-varying | [4] |
| $\mu$                                       | Adult mosquito mortality rate                                                                       | Time-varying | [4] |
| $f$                                         | Blood feeding rate                                                                                  | 1/3          | [5] |
| $Q$                                         | Human blood index                                                                                   | 0.9          | [5] |
| <b>Vector control:</b>                      |                                                                                                     |              |     |
| $\theta_B$                                  | Proportion of bites on a person in bed                                                              | 0.89         | [6] |
| $\theta_I$                                  | Proportion of bites on a person outdoors                                                            | 0.97         | [6] |
| $r_{LLIN}$                                  | Probability of repeating a feeding attempt in the presence of long-lasting insecticide-treated nets | 0.56         | [6] |
| $r_{IRS}$                                   | Probability of repeating a feeding attempt in the presence of indoor residual spraying              | 0.60         | [6] |
| $s_{LLIN}$                                  | Probability of feeding and surviving in the presence of long-lasting insecticide-treated nets       | 0.03         | [6] |
| $s_{IRS}$                                   | Probability of feeding and surviving in the presence of indoor residual spraying                    | 0            | [6] |
| <b>Intervention setting and demography:</b> |                                                                                                     |              |     |
| $N_H$                                       | Human population size                                                                               | 223,000      | [7] |
| $PfPr$                                      | All-ages <i>P. falciparum</i> prevalence                                                            | 0.02         | [8] |
| $\chi_{LLIN}$                               | Proportion of population using long-lasting insecticide-treated nets                                | 0.62         | [7] |
| $\chi_{IRS}$                                | Proportion of population using indoor residual spraying                                             | 0.665        | [7] |
| $f_T$                                       | Proportion of population using artemisinin-based combination therapy                                | 0.02         | [7] |

## References:

1. Carballar-Lejarazú R, Dong Y, Pham TB, Tushar T, Corder RM, Mondal A, Sánchez C. HM, Lee HF, Marshall JM, Dimopoulos G, James AA (2023) Dual effector population modification gene-drive strains of the African malaria mosquitoes, *Anopheles gambiae* and *Anopheles coluzzii*. Proc Natl Acad Sci USA 120:e2221118120.
2. White MT, Griffin JT, Churcher TS, Ferguson NM, Basáñez MG, Ghani AC (2011) Modelling the impact of vector control interventions on *Anopheles gambiae* population dynamics. Parasites & Vectors 4(1):153.
3. Bayoh MN, Lindsay SW (2003) Effect of temperature on the development of the aquatic stages of *Anopheles gambiae sensu stricto* (Diptera: Culicidae). Bull Entomol Res 93(5):375–81.
4. Winskill P (2022) umbrella: Rainfall & seasonality. R package version 0.2.0.
5. Smith DL, Ellis McKenzie F (2004) Statics and dynamics of malaria infection in *Anopheles mosquitoes*. Malar J 3(1):13.
6. Le Menach A, Takala S, McKenzie FE, Perisse A, Harris A, Flahault A, Smith DL (2007) An elaborated feeding cycle model for reductions in vectorial capacity of night-biting mosquitoes by insecticide-treated nets. Malar J 6(1):10.
7. World Bank. São Tomé and Príncipe (<https://data.worldbank.org/country/sao-tome-and-principe>).
8. World Health Organization Global Health Observatory (<https://www.who.int/data/gho>).
